# Supplementary material for: Bacterial precursors and unsaturated long-chain fatty acids are biomarkers of North-Atlantic deep-sea demosponges
Source: PLOS journal article supplement (doi:10.1371/journal.pone.0241095), 2021-01-27

Fig. S1: Mass spectra of DMDS conducts of C<sub>26</sub> (a,b) and C<sub>28</sub> (c,d) LCFA with  $\Delta^{9,19}$  (a,c) and  $\Delta^{11,21}$  (b,d) unsaturation

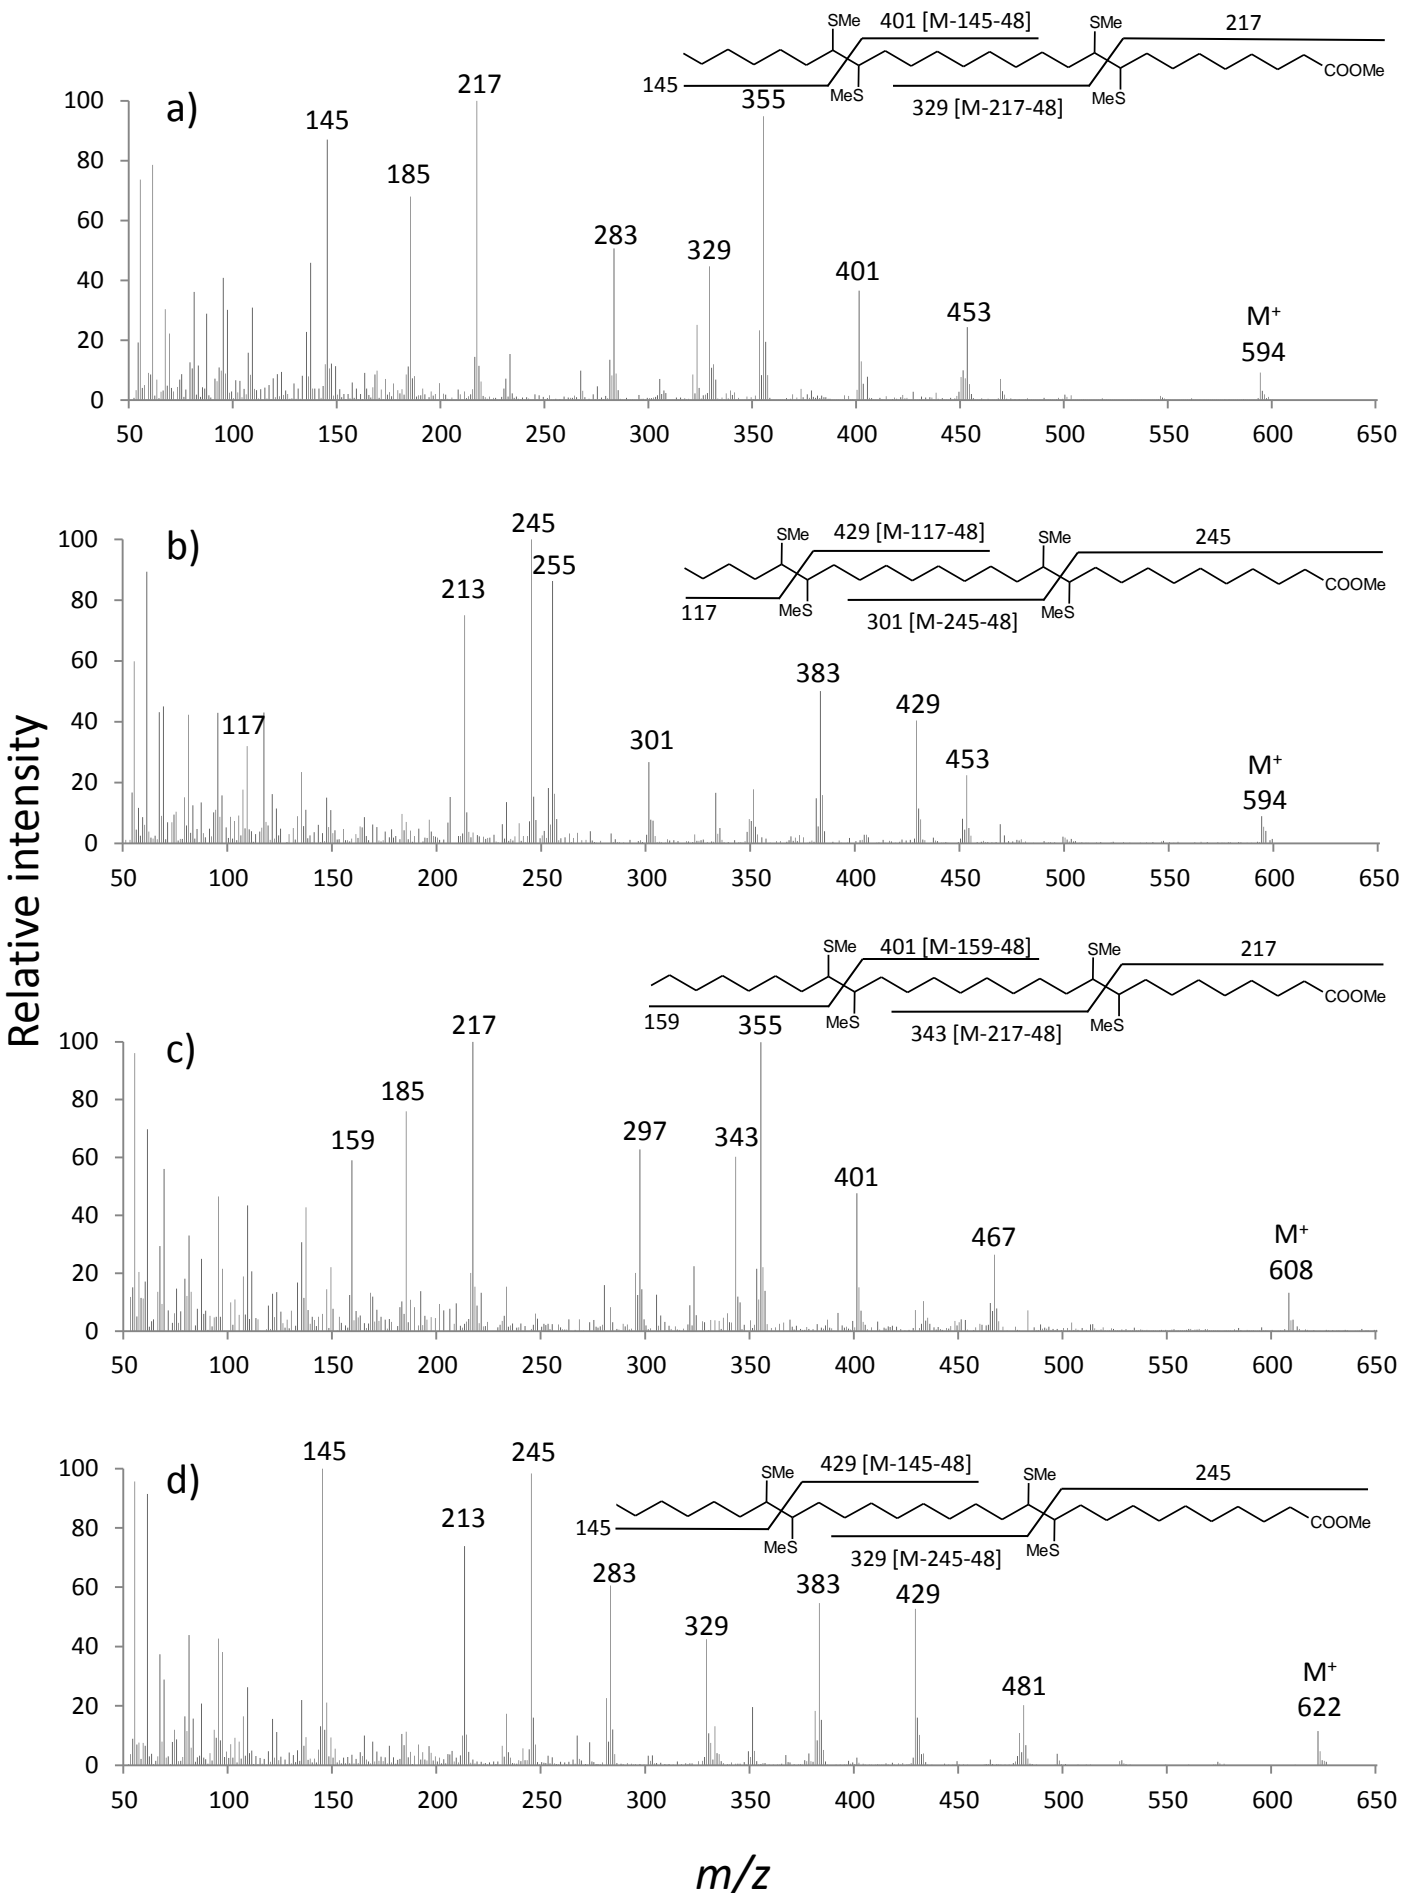

Supplement: S1 (10.1371/journal.pone.0241095.s001) [file de%20Kluijver%20et%20al%20PLOS%20One%202021-journal.pone.0241095.s001.pdf]
