# Supplementary material for: Bacterial precursors and unsaturated long-chain fatty acids are biomarkers of North-Atlantic deep-sea demosponges
Source: PLoS One. 2021 Jan 27;16(1):e0241095. doi: 10.1371/journal.pone.0241095 (PMC7840048; doi:10.1371/journal.pone.0241095)
Supplement: S1 Table — This excel file contains fatty acid data (μg g DW-1 and relative abundance (%), in PL and TL) of individual specimens. The excel file also contains the fragments of Me-branched C16 and C18, the relative positions of saturated (branched and linear) FAMEs in hydrogenated samples and the isotope data. (XLSX) [file pone.0241095.s002.xlsx]

## Sheet: Schulz data
		PLFA							TL
		GH_S		GP_S		SR_S					GHS		GPS		StRaS
ecl	FA name	µg/gDW	%	µg/gDW	%	µg/gDW	%		ecl	FA name	µg/gDW	%	µg/gDW	%	µg/gDW	%
12	C12:0 (internal std)	81.3576	0.0303715	70.9325	0.0206591	68.3351	0.0230828		12	C12:0 (internal std)	238.43		142.15		212.704
12.5289	C13:0	5.59143	0.00208733		0		0		12.3718	UNKN ecl12.372			6.75241	0.00156023	6.68197	0.00142708
13.3597	i-C14	5.35211	0.00199799		0		0		12.4713	UNKN ecl12.471			3.62787	0.000838263	5.6589	0.00120858
13.7223	c14:0	34.9834	0.0130596	32.993	0.00960922	31.2479	0.0105551		12.53	UNKN C13:0	5.71605	0.00200107	9.36047	0.00216285	11.5083	0.00245783
14.1963	Me-c14	40.4042	0.0150833	50.6434	0.0147499	49.0434	0.0165662		13.3614	iC14	5.97465	0.0020916	7.34296	0.00169668	8.97172	0.0019161
14.4084	i-c15:0	50.0175	0.018672	79.5005	0.0231545	63.3947	0.021414		13.722	C14:0	42.529	0.0148885	49.7691	0.0114997	54.2961	0.0115961
14.4906	a-C15:0	69.0174	0.0257648	93.2787	0.0271674	96.7895	0.0326943		14.223	Me-C14	64.9096	0.0227235	106.248	0.0245498	127.575	0.0272464
14.7084	C15:0	9.21738	0.00344093	10.328	0.00300803	8.73902	0.00295193		14.3295	unkn 13.34	11.2644	0.00394342
14.8044	UNKN ecl14.802	17.8421	0.0066606	15.8111	0.00460497	17.841	0.00602645		14.4062	iC15:0	49.886	0.017464	91.9048	0.0212357	79.9463	0.0170742
14.9197	UNKN ecl14.919	9.93607	0.00370923	17.7033	0.0051561		0		14.4912	aiC15:0	67.5418	0.023645	104.774	0.0242093	126.792	0.027079
15.33	Me-C15	42.579	0.0158951	11.6967	0.00340666	13.0359	0.00440338		14.5547	15:1w11c					4.16982	0.000890553
15.3652	Me-C15		0	45.4209	0.0132288	33.1453	0.0111961		14.7366	C15:0	13.5622	0.00474784	16.43	0.00379634	16.0469	0.00342715
15.4101	UNKN ecl15.41	7.3413	0.00274057		0		0		14.8046	UNKN ecl14.805	19.0485	0.00666848	17.5913	0.00406468	23.0796	0.00492913
15.6009	16:1w9c	71.2664	0.0266044	84.8456	0.0247113	63.7574	0.0215365		14.9173	UNKN ecl14.917			17.057	0.00394123
15.6875	16:1w7c	177.579	0.0662918	237.37	0.0691341	227.32	0.0767859		15.0944	UNKN ecl15.094			43.909	0.0101457
15.7873	16:1w5c	61.0276	0.0227822	57.0955	0.0166291	67.824	0.0229101		15.3506	Me-C15	77.5652	0.027154	84.3673	0.0194941	103.042	0.0220068
16	C16:0	90.7439	0.0338755	105.564	0.0307455	105.207	0.0355378		15.6035	16:1w9c	71.903	0.0251717	90.6555	0.020947	75.4268	0.016109
16.0646	UNKN ecl16.064	6.25449	0.00233486	10.5247	0.00306531		0		15.6857	16:1w7c	153.356	0.0536868	250.104	0.0577894	278.891	0.059563
16.0969	UNKN ecl16.095	8.52374	0.00318199	8.55118	0.00249053		0		15.789	16:1w5c	71.902	0.0251714	85.8838	0.0198445	106.811	0.0228116
16.1951	UNKN ecl16.195	8.92032	0.00333004		0		0		16	C16:0	90.8218	0.0317948	133.438	0.0308324	137.356	0.0293352
16.3103	iC17:1w7	13.7081	0.00511737	39.3814	0.0114698	27.4155	0.00926063		16.0659	UNKN ecl16.066			23.2769	0.0053784
16.36	UNKN ecl16.360	21.1227	0.00788529	25.8251	0.00752156	25.1651	0.00850047		16.3564	iC17:1w7	147.275	0.0515581	210.011	0.0485255	241.147	0.0515019
16.454	8/9/10/11-Me-C16:0	379.196	0.141557	515.697	0.150197	465.655	0.157293		16.3611	UNKN ecl16.361	46.4051	0.0162455
16.63	iC17:0	42.7303	0.0159516	51.794	0.015085	55.8159	0.0188539		16.4576	8/9/10/11-MeC16:0	395.103	0.138317	546.615	0.126302	602.708	0.128721
16.6897	aC17:0	27.8504	0.0103968	31.9734	0.00931225	33.3314	0.0112589		16.5451	UNKN ecl16.545			18.6518	0.00430972
16.7762	cy-C17	12.8394	0.00479305	14.4876	0.00421952	20.082	0.00678344		16.6269	iC17:0	37.0559	0.0129725	44.01	0.010169	59.2197	0.0126476
16.9799	C17:0	7.60863	0.00284037	8.02095	0.0023361	9.6516	0.00326019		16.7007	aiC17:0	30.7083	0.0107503	40.1803	0.00928413	47.1761	0.0100755
17.4084	Me-C17	54.9726	0.0205218	63.098	0.0183773	54.9253	0.0185531		16.7733	cy-C17			12.6878	0.00293166	20.1924	0.00431251
17.6571	18:1w9c	37.7215	0.0140818	47.615	0.0138679	41.0119	0.0138533		16.9801	C17:0			120.878	0.0279303	96.8371	0.0206816
17.7321	18:1w7	146.981	0.0548694	122.586	0.0357032	142.32	0.0480741		17.33	18:3w6
17.7774	UNKN ecl17.777	11.093	0.00414111	10.7722	0.00313741	8.85521	0.00299118		17.4071	Me-C17	56.0379	0.0196177	80.3103	0.0185567	89.4349	0.0191007
17.999	c18:0	61.0751	0.0227999	76.5156	0.0222852	68.2862	0.0230662		17.53	18:2w6c
18.0539	UNKN ecl18.053	15.0224	0.00560798	20.1113	0.0058574	23.0418	0.00778324		17.56	18:2w6/18:3w3
18.1108	i19:1w12	128.691	0.0480417	144.359	0.0420445	149.316	0.0504371		17.6524	18:1w9c	37.0868	0.0129833	51.4699	0.0118927	51.8152	0.0110662
18.4643	9/10/11-MeC18	492.337	0.183794	696.389	0.202823	667.963	0.22563		17.7271	18:1w7	125.68	0.043998	149.073	0.0344451	175.087	0.0373935
18.4922	UNKN ecl18.488	11.0626	0.00412976	13.9969	0.00407661	15.5977	0.0052687		17.7743	18:1w9t	8.67294	0.00303622			9.4025	0.0020081
18.6006	UNKN ecl18.599	7.3381	0.00273938	8.86446	0.00258177	11.3939	0.00384871		17.9965	c18:0	61.0733	0.0213805	85.9145	0.0198516	95.4808	0.0203919
18.7035	UNKN ecl18.704	8.79731	0.00328412		0		0		18.1115	i19:1w12	112.675	0.0394451	151.404	0.0349837	195.73	0.0418022
18.7953	cy-c19	40.097	0.0149686	34.986	0.0101897	45.5975	0.0154023		18.4548	9/10/11-MeC18	499.514	0.174869	736.129	0.170092	873.893	0.186638
19	C19:0 (internal std)	86.3877		92.6921		93.0592			18.5945	UNKN ecl18.595	12.8877	0.00451173	10.7907	0.00249333	17.4556	0.00372801
19.0869	20:4w6/20:5w3	12.1851	0.0045488	15.4645	0.00450404	15.9169	0.00537652		18.6991	UNKN ecl18.699			7.04151	0.00162702	9.65649	0.00206235
19.8103	20:1w5		0	10.5251	0.00306543		0		18.7869	cy-c19	32.1137	0.0112423	36.0622	0.00833261	51.2335	0.010942
20.8384	22:6w3	7.25355	0.00270782	15.2988	0.00445579		0		18.9195	UNKN ecl18.92					76.6137	0.0163625
22.1861	C23:0	10.2284	0.00381836		0		0		19	C19:0 (internal std)	174.055		184.294		184.294
22.6917	C23:0	7.00385	0.0026146	14.0498	0.00409202		0		19.0692	UNKN ecl19.069			16.2125	0.00374609
23.0935	C24:2(d5,9)	8.26317	0.00308472	47.3943	0.0138036		0		19.1034	20:4w6/20:5w3			12.0625	0.00278719	30.2975	0.00647066
23.6698	i-C25:2(d5,9)		0	306.658	0.0893141	27.5102	0.0092926		19.8017	20:1w5			12.3703	0.00285832
23.7426	a-C25:2(d5,9)		0	143.296	0.0417349	16.8785	0.00570134		19.9597	C20:0			21.3549	0.00493429	27.9803	0.00597578
23.9538	25:2w?	11.9286	0.00445305		0		0		20.92	22:6w3			18.7485	0.00433207
24.7317	C26:2(d5,9)	126.701	0.0366891	13.7912	0.0040167				21.2757	22:2w			7.8869	0.00182236
24.8254	C26:2(d9,19)	211.391	0.0789141	12.3736	0.00360382		0		21.8606	22:1w?			4.28959	0.000991162
25.1123	UNKN ecl25.167		0		0	28.5655	0.00964906		22.605	C23:0			9.55578	0.00220798	18.6849	0.00399055
25.1684	Me-C26:2(d5,9)	35.4752	0.0132432		0	14.1931	0.00479425		22.7521	UNKN ecl22.752			17.0311	0.00393524
25.3041	(a)i-C27:2	5.5007	0.00205346		0		0		23.0704	C24:2(d5,9)			67.396	0.0155726	16.0325	0.00342409
25.9296	C28:2d(5,9)		0		0	30.7237	0.0103781		23.6499	i-C25:2(d5,9)	9.92298	0.00347383	350.455	0.0809768	49.6917	0.0106127
26.2206	C28:2(d11,21)		0		0	13.8584	0.0046812		23.7613	ai-C25:2(d5,9)			157.641	0.0364248	28.3174	0.00604777
26.3176	C28:2(d11,21)		0	54.9954	0.0160174	10.7842	0.00364278		23.9279	C25:1	29.3181	0.0102637	17.4058	0.00402182	20.4209	0.00436131
26.7079	me-C28:2d(5,9)		0		0	142.093	0.0479971		24.2745	C25:0			19.6665	0.00454419	68.6213	0.0146555
27.0606	UNKN c29:2w		0		0	17.1454	0.00579149		24.5757	UNKN ecl24.576	29.7336	0.0104091	17.9931	0.00415752
27.6299	UNKN 30:3w?		0	11.8305	0.00344563		0		24.7357	C26:2(d5,9)	117.653	0.0411879	26.5914	0.00614425	27.0398	0.00577492
29.6412	UNKN ecl29.641	5.97305	0.00222979		0		0		24.82	C26:2(d9,19)	246.625	0.0863383
	sum	2678.75		3433.48		2960.44			25.082	UNKN ecl25.08					56.8334	0.012138
									25.1684	Me-C26:2(d5,9)	34.4626	0.0120646			32.6944	0.00698257
	bacterial		0.709272		0.692242		0.771709		25.3041	(a)i-C27:2			11.8324	0.00273401	7.60058	0.00162326
	sponge		0.137583		0.171936		0.101928		25.8884	C28:2d(5,9)					52.4931	0.011211
	other		0.0897059		0.0841013		0.0807478		26.14	C28:2(d11,21)					44.9555	0.00960119
									26.2697	C28:2(d11,21)	27.0154	0.00945753	86.3382	0.0199495	26.6698	0.0056959
	sum 16:1		0.115678		0.110474		0.121232		26.647	me-C28:2d(5,9)					256.614	0.0548054
	sum 18:1		0.0740686		0.0610409		0.071188		26.98	UNKN c29:2w
									27.0099	UNKN c29:2w	13.4955	0.00472449			38.0009	0.00811588
									27.3155	UNKN 30:3w?			9.29122	0.00214685					3.95554
										sum	2856.5		4327.84		4682.28				16
																			0.247221
											0.937773		0.793346		0.632264

## Sheet: Langseth data
		GH1		GH2		GH3		av GH	av all GH (inc Schulz)	GP1		GP2		GP3		av GP	av all GP (inc Schulz)			SR1		SR 2		av SR	vall SR (inc Schulz)
FA name	ECL	µg/g DW	%	µg/g DW	%	µg/g DW	%	%		µg/g DW	%	µg/g DW	%		%			ecl	FA name	µg/g DW	%	µg/g DW	%	%
C12:0 (internal std)	12	33.3138	0.00588522	10.4424	0.00152937	84.021	0.00813413	0.00518291				49.6939	0.00717097	51.1867	0.00688569	0.00702833		12	C12:0 (internal std)	451.718		42.1322
iC14	13.28	6.99334	0.00123544	7.12329	0.00104325	13.6188	0.00131845	0.00119905						15.1222	0.00203426	0.00203426		13.6402	c14	484.027	0.0168548	146.472	0.0173397	0.0170973
C14:0	13.64	56.6216	0.0100028	44.329	0.00649229	93.2018	0.00902293	0.008506		35.6095	0.00538999	58.2603	0.00840712	75.3559	0.010137	0.00797803		14.1118	me-c14	505.276	0.0175947	172.393	0.0204083	0.0190015
Me-C14	14.11	87.4627	0.0154512	83.0029	0.0121563	121.788	0.0117904	0.0131326		83.4844	0.0126365	82.591	0.0119181	98.2738	0.0132199	0.0125915		14.3271	ic15	1447.98	0.0504217	398.339	0.0471564	0.0487891
iC15:0	14.32	259.015	0.0457576	190.145	0.027848	326.517	0.0316104	0.035072		144.781	0.0219147	156.525	0.022587	239.787	0.0322564	0.025586		14.4071	aic15	1450.64	0.0505144	382.133	0.0452378	0.0478761
aiC15:0	14.4	98.9524	0.0174809	146.001	0.0213829	255.065	0.024693	0.0211856		132.65	0.0200783	92.9501	0.013413	136.278	0.0183323	0.0172745		14.639	15:1w5c		0	32.328	0.00382707	0.00191354
15:1w11c	14.56																	14.7497	C15:0	178.615	0.00621974	38.5899	0.00456838	0.00539406
C15:0	14.75	66.3414	0.0117199	19.9125	0.00291633	41.9689	0.00406304	0.00623308				25.262	0.00364538	63.4352	0.00853338	0.00608938		14.8356	(a)i16:1w	117.982	0.00410839		0	0.0020542
(a)i16:1w	14.8606			22.811	0.00334083	51.1589	0.00495273	0.00414678										15.3141	Me-C15	342.809	0.0119373	205.587	0.024338	0.0181376
Me-C15	15.34	118.205	0.0208821	109.772	0.0160769	135.462	0.0131142	0.0166911		122.016	0.0184688	108.217	0.015616	173.37	0.0233219	0.0191356		15.558	16:1w9	761.107	0.0265033	231.174	0.027367	0.0269352
iC16:0	15.53																	15.661	16:1w7	2509.12	0.0873728	685.067	0.0811	0.0842364
16:1w9c	15.5828	293.39	0.0518303	92.1136	0.0134907	120.192	0.0116359	0.0256523		150.135	0.0227251	135.024	0.0194844	498.13	0.067009	0.0364061		15.7669	16:1w5	771.274	0.0268574	254.346	0.0301101	0.0284837
16:1w7c	15.64	412.24	0.0728263	634.469	0.0929224	845.36	0.0818399	0.0825295		507.714	0.0768495	344.296	0.0496828	419.155	0.0563852	0.0609725		16	c16:0	1304.85	0.0454377	383.646	0.045417	0.0454274
16:1w5c	15.777	85.6175	0.0151252	107.637	0.0157642	210.456	0.0203744	0.0170879		97.2625	0.014722	104.359	0.0150593	119.466	0.0160707	0.015284		16.3009	iC17:1w7/17:1w8	412.19	0.0143533	152.589	0.0180639	0.0162086
C16:0	16	224.387	0.0396403	237.802	0.0348278	340.064	0.0329218	0.0357966		190.357	0.0288132	197.578	0.0285111	292.876	0.039398	0.0322408		16.4476	8/9/10/11-MeC16:0	3340.49	0.116323	1084.06	0.128334	0.122328
iC17:1w7/17:1w8	16.3			133.378	0.0195341	187.855	0.0181864	0.0188602		69.558	0.0105286	58.5773	0.00845287			0.00949071		16.6094	iC17:0	648.444	0.0225802	204.035	0.0241542	0.0233672
8/9/10/11-MeC16:0	16.43	854.757	0.151001	893.996	0.130932	1216.85	0.117804	0.133246		883.371	0.13371	999.247	0.144194	193.171	0.0259855	0.101297		16.6771	aiC17:0	284.555	0.00990879	133.328	0.0157838	0.0128463
iC17:0	16.62	66.6567	0.0117756	71.5875	0.0104845	108.85	0.0105379	0.0109326		64.5154	0.0097653	97.4552	0.0140631	90.6181	0.0121901	0.0120061		16.7512	17:1w8c	139.257	0.00484921		0	0.00242461
aiC17:0	16.67	45.4195	0.00802382	66.0411	0.00967217	92.2131	0.00892722	0.0088744		45.2794	0.00685367	53.5583	0.00772862	71.9999	0.00968552	0.00808927		16.9754	C17:0	95.3672	0.00332088	27.4976	0.00325523	0.00328806
cyC17	16.77	33.875	0.00598435	35.7602	0.00523733	49.9989	0.00484043	0.00535404						39.5699	0.00532299	0.00532299		17.3875	Me-C17	535.625	0.0186516	193.019	0.0228501	0.0207509
C17:0	16.98	18.3392	0.0032398	19.8713	0.00291029	23.3246	0.00225807	0.00280272						18.0698	0.00243077	0.00243077		17.6352	18:1w9c	479.732	0.0167053	133.461	0.0157994	0.0162524
Me-C17	17.4	92.9837	0.0164265	113.577	0.0166341	150.114	0.0145326	0.0158644		117.685	0.0178132	125.092	0.0180511	148.641	0.0199954	0.0186199		17.7023	18:1w7	939.036	0.0326992	248.118	0.0293729	0.031036
18:1w9c	17.64	127.642	0.0225493	87.393	0.0127993	126.827	0.0122782	0.0158756		103.061	0.0155998	91.6643	0.0132274			0.0144136		18.0005	c18:0	963.37	0.0335465	295.511	0.0349833	0.0342649
18:1w7	17.7093	145.769	0.0257515	268.712	0.0393547	319.179	0.0308999	0.032002		241.258	0.0365177	154.937	0.0223578	445.637	0.0599477	0.0396077		18.0994	i19:1w12	1389.22	0.0483754	398.141	0.047133	0.0477542
C18:0	17.99	196.241	0.034668	202.754	0.0296947	321.34	0.0311091	0.031824		203.246	0.0307641	230.937	0.0333248	237.888	0.032001	0.03203		18.5061	9/10/11-MeC18	5116.7	0.178174	1505.95	0.178278	0.178226
i19:1w12	18.12	159.444	0.0281674	280.362	0.0410609	425.172	0.0411612	0.0367965		220.717	0.0334085	381.118	0.0549963	326.942	0.0439807	0.0441285		18.6026	9/10/11-MeC18	209.605	0.00729887	51.0611	0.00604474	0.00667181
9/10/11-MeC18	18.3963	1012.2	0.178815	1398	0.204746	2224.37	0.215343	0.199635		1463.98	0.221594	1868.74	0.269664	1648.21	0.22172	0.237659		18.7868	cy-c19	400.084	0.0139318	80.7469	0.00955903	0.0117454
cy-c19:0	18.78	66.74	0.0116529	88.843	0.0128445	100.055	0.00959346	0.0113636		41.453	0.00627448	28.8708	0.00416613	89.1574	0.0119936	0.00795139		19	C19:0 (internal std)	1087.5		63.5505
C19:0 (internal std)	19	34.1305	0.00602949	32.1677	0.00471118	201.37	0.0194948	0.0100785		45.3536	0.00686489	187.321	0.0270309	59.445	0.00799661	0.0139641		19.0735	20:4w6/20:5w3	161.096	0.00560969	61.1857	0.00724332	0.00642651
20:4w6/20:5w3	19.1	35.4408	0.00626098					0.00626098						46.5525	0.0062623	0.0062623		22.3167	C22:0	128.086	0.00446023		0	0.00223011
20:3w6	19.32																	23.8575	25:2w?	105.241	0.0036647		0	0.00183235
20:2w	19.37	3.30721	0.000584251					0.000584251										25.2953	(a)i-C27:2	453.413	0.0157888	100.573	0.0119061	0.0138475
20:1w9c	19.66													5.48045	0.000737237	0.000737237		25.3494	Me-C26:2	285.027	0.00992525	52.9165	0.00626439	0.00809482
C20:0	20.01	12.1511	0.00214662					0.00214662										26.1447	C28:2(d5,9)	246.123	0.00857053	61.0819	0.00723103	0.00790078
22:6w3	20.92	30.2291	0.00534027	0	0	0	0	0.00178009		66.043	0.00999652	0	0	84.0347	0.0113044	0.00710032		26.4455	C28:2(d5,9)	167.709	0.00583999	33.169	0.00392663	0.00488331
22:2w	21.28													15.0336	0.00202234	0.00202234		26.977	Me-C28:2	1713.39	0.0596639	480.469	0.0568792	0.0582716
C23:0	22.33	23.9204	0.00422579	23.2398	0.00340362	43.6753	0.00422823	0.00395255				19.9159	0.00287392	20.1457	0.00271002	0.00279197		27.3127	c29:3	274.955	0.0095745	49.5207	0.00586239	0.00771845
C23:0	22.88													25.788	0.00346903	0.00346903		30.0331	30:3w?	94.5822	0.00329355	85.4813	0.0101195	0.00670653
C24:2_1	23.16	7.2862	0.00128718					0.00128718										30.2013	30:3w?/32:1w	132.81	0.00462474	42.2223	0.00499839	0.00481156
C24:2(d5,9)	23.24	21.0846	0.00372481	18.0573	0.00264461	23.8873	0.00231255	0.00289399		93.7179	0.0141855	77.6823	0.0112098	76.9631	0.0103532	0.0119161		31.5203	32:1w?	127.618	0.00444391	42.9754	0.00508754	0.00476573
C24:0	23.7707	9.80986	0.00173301	20.9335	0.00306586	45.2592	0.00438157	0.00306015											sum	28717.4		8447.19
me-24:2	23.7844	10.054	0.00177614					0.00177614						88.998	0.0119721	0.0119721
i25:2w(d5,9)	23.93									825.649	0.124973	728.969	0.105192	885.052	0.119058	0.116408			bacterial		0.792707		0.809901	0.801304	0.791439
ai-C25:2w(d5,9)	24.02									336.8	0.0509793	265.837	0.038361	268.955	0.0361802	0.0418402			sponge		0.12539		0.112275	0.118833	0.113198
C25:0	24.14			50.8496	0.00744728	117.921	0.011416	0.00943165						10.3219	0.00138852	0.00138852			other		0.0819031		0.0778236	0.0798634	0.0801582
C26:2	24.8004	101.476		61.2996	0.00897774	93.39	0.00904116	0.00900945		36.2918	0.00549326	26.3362	0.00380038	34.3794	0.00462476	0.00463947
C26:2d(5,9)	25.09	230.422	0.0407063	348.758	0.0510781	922.148	0.0892738	0.0603527											som 16:1		0.140734		0.138577	0.139655
C26:2(d9,19)	25.1053	606.964	0.107226	462.807	0.0677813	871.23	0.0843443	0.0864506											som 18:1		0.0494045		0.0451723	0.0472884
C27:2	25.3									39.8512	0.00603203	51.2155	0.00739053	49.3543	0.0066392	0.00668725
Me-C26:2	25.41			114.21	0.0167268	210.712	0.0203991	0.018563
C28:2(d5,9)	26.67	5.83532	0.00103087					0.00103087
C28:2(d5,9)	27.13	0	0	185.038	0.0271001	0	0	0.00903336
C28:2(d11,21)	27.31									290.112	0.0439124	314.971	0.0454512	299.562	0.0402974	0.0432203
30:3w?/32:1w	30.11			30.85	0.0045182	16.1933	0.00156769	0.00304294
C32:2w?	30.74			44.2586	0.00648198			0.00648198
32:1w?	30.89	0	0	101.815	0.0149115	0	0	0.00497051						30.8096	0.00414454	0.462756
sum		5660.59		6827.95		10329.4				6606.6		6929.88		7433.77
bacterial			0.700737		0.707325		0.685433	0.697832	0.700692		0.67946		0.704662		0.639451	0.674524	0.678954
sponge			0.157485		0.210733		0.222736	0.196985	0.182134		0.23139		0.200195		0.224305	0.21863	0.206957
other			0.109559		0.0768186		0.0789619	0.0884465	0.0887613		0.0695738		0.0683551		0.10264	0.0801896	0.0811675
som 16:1			0.139782		0.122177		0.11385	0.12527			0.114297		0.0842265		0.139465	0.112663
sum 18:1			0.0483008		0.052154		0.0431782	0.0478777			0.0521175		0.0355852		0.0599477	0.0492168
note that the ecl in this sheet deviate, because of analytical column replacement

## Sheet: Barents Sea data
ecl	name	GB1	GB2	GB3	GB4		GB5		GB6		AVGB		ecl	name	GA1		GA2		AVGA
		%	%	%	µg / gDW	%	µg / gDW	%	µg / gDW	%	%				µg / gDW	%	µg / gDW	%	%
13.7179	C14:0	0.00824667	0.0101136	0.0110983	42.3794	0.00936613	23.8898	0.00861653	59.4405	0.0100899	0.00958854		13.7209	C14:0	17.2285	0.00636092	16.8861	0.011198	0.00877948
14.1987	me-C14:0	0.0095147	0.0105545	0.0156624	52.4342	0.0115883	48.8005	0.0176013	103.882	0.0176339	0.0137592		14.1967	Me-C14	17.0203	0.00628404	10.8963	0.00722592	0.00675498
14.4162	ic15:0	0.0308805	0.0342238	0.0361113	161.986	0.0358	107.872	0.0389071	215.364	0.0365578	0.0354134		14.4116	iC15:0	80.0579	0.029558	46.6748	0.0309525	0.0302553
14.4919	aic15:0	0.0233913	0.0259238	0.0273535	100.756	0.0222678	80.0162	0.0288601	157.239	0.0266911	0.0257479		14.488	aiC15:0	48.9471	0.0180717	51.5677	0.0341973	0.0261345
15.3448	me-C15	0.00906035	0.00962201	0.0111751	13.1071	0.00289675	27.4463	0.00989929	78.4608	0.0133186	0.00932869		14.8005	C15:0	12.0158	0.00443634	7.91531	0.00524906	0.0048427
15.6011	16:1w9c	0	0	0		0	43.576	0.0157169	68.9349	0.0117016	0.00456975		14.9159	UNKN ecl14.916	20.8698	0.0077053		0	0.00385265
15.702	16:1w7c	0.0792058	0.087975	0.0896877	404.045	0.0892968	243.306	0.0877551	507.405	0.0861314	0.0866753		15.3552	Me-C15	18.9063	0.00698035	8.50432	0.00563966	0.00631001
15.7894	16:1w5c	0.0201778	0.0232804	0.0265208	88.3776	0.0195321	52.5345	0.018948	117.139	0.0198842	0.0213905		15.5974	16:1w9c	31.267	0.011544	30.1223	0.0199757	0.0157599
16	C16:0	0.0338171	0.0405251	0.0446661	156.075	0.0344935	94.3994	0.0340478	211.697	0.0359353	0.0372475		15.6842	16:1w7c	174.181	0.064309	95.597	0.0633954	0.0638522
16.3327	iC17:1w7	0.0434715	0.0480608	0.0479946	270.357	0.0597508	165.678	0.0597565	373.446	0.0633919	0.0537377		15.7846	16:1w5c	44.2951	0.0163541	20.018	0.013275	0.0148146
16.4599	8/9/10/11-MeC16:0	0.100209	0.118948	0.11455	425.258	0.093985	246.97	0.0890765	615.524	0.104484	0.103542		16	C16:0	95.562	0.0352823	120.922	0.0801896	0.057736
16.6215	iC17:0	0.0124308	0.0145737	0.0132058	62.1978	0.0137461	32.8888	0.0118623	78.879	0.0133896	0.0132014		16.0527	UNKN ecl16.053	11.3767	0.00420037		0	0.00210019
16.7006	17:1w7c	0.0120486	0.0136815	0.0120261	47.961	0.0105997	43.671	0.0157512	80.1507	0.0136055	0.0129521		16.3227	iC17:1w7	123.955	0.0457652	58.8511	0.0390273	0.0423962
17.4044	Me-C17	0.0281153	0.0193517	0.0194114	138.542	0.0306186	110.59	0.0398874	175.696	0.0298242	0.0278681		16.3575	UNKN ecl16.357	13.9128	0.00513671		0	0.00256836
17.653	18:1w9c	0	0	0		0		0	55.4152	0.00940666	0.00156778		16.44	8/9/10/11-MeC16:0	238.987	0.0882359	119.143	0.0790103	0.0836231
17.7207	MULT 18:1w7	0.0435513	0.0453889	0.0431436	217.329	0.0480313	101.604	0.0366463	208.575	0.0354053	0.0420278		16.6179	iC17:0	32.1359	0.0118649	14.1032	0.00935257	0.0106087
18.0013	c18:0	0.041187	0.0344587	0.0325389	177.097	0.0391395	103.376	0.0372854	232.726	0.0395049	0.0373524		16.6871	aiC17:0	26.1848	0.00966765	28.2528	0.0187359	0.0142018
18.1082	i19:1w12	0.0399912	0.0465145	0.0472075	118.557	0.026202	33.5448	0.0120989	0.652434	0.00011075	0.0286875		16.7669	cy-C17	15.4797	0.00571522	16.1382	0.0107021	0.00820864
18.4785	9/10/11-MeC18	0.172589	0.203606	0.20781	826.092	0.182572	293.803	0.105968	1001.23	0.169957	0.173751		17.3942	Me-C17	67.0432	0.0247529	56.271	0.0373163	0.0310346
18.77	cyc-c190	0.0162936	0.011083	0.0072857	47.2365	0.0104396	21.1723	0.0076364	96.7233	0.0164186	0.0115261		17.6427	18:1w9c	42.1848	0.015575	12.8475	0.00851985	0.0120474
20.8016	22:6w3	0.0139894	0.00536988	0.00720964	64.664	0.0142912	67.8245	0.0244628	79.8562	0.0135555	0.0131464		17.7127	18:1w7c	75.532	0.0278871	53.5696	0.0355249	0.031706
23.8374	ic25:1w7?	0.0170848	0.0138381	0.0108391	87.6326	0.0193674	71.9513	0.0259513	131.92	0.0223933	0.0182457		17.989	c18:0	100.656	0.037163	85.4926	0.0566947	0.0469288
24.7282	c26:2(5,9)	0.0107194	0.0259035	0.00968638	223.11	0.0493087	114.571	0.0413233	48.5388	0.00823939	0.0241968		18.1344	i19:1w12	92.6831	0.0342194	7.64688	0.00507105	0.0196452
24.7895	c26:2(9,19)	0.117736	0.083078	0.0827841	254.072	0.0561517	180.786	0.0652055	595.206	0.101035	0.0843318		18.4484	9/10/11-MeC18	463.531	0.171139	106.42	0.0705728	0.120856
25.0752	c27:2 (me-C26:2)	0.0297449	0.0262409	0.0294176	104.251	0.0230403	139.55	0.0503328	0	0	0.0264627		18.7695	cy-c19	28.2766	0.01044	12.8476	0.00851989	0.00947993
25.1502	c27:2 (me-C26:2)	0	0	0	167.488	0.0370161	112.526	0.0405855	184.661	0.0313459	0.0181579		19.0903	20:4w6/20:5w3	14.6865	0.00542239	15.1998	0.0100798	0.00775108
25.1959	i27:2w	0.0140131	0.00626946	0.00733229	83.022	0.0183484	53.1583	0.0191731	191.647	0.0325319	0.016278		19.9204	C20:0	9.68318	0.00357511		0	0.00178756
25.2642	ai-C27:2 (me-C26:2)	0	0	0	61.6335	0.0136214	54.6503	0.0197112	65.3501	0.0110931	0.00740428		20.796	22:6w3	13.5566	0.0050052	48.8198	0.032375	0.0186901
25.3262	UNKN c27:2	0	0	0	30.4392	0.00672727	18.7759	0.00677204	52.0666	0.00883823	0.00372292		22.3023	C23:0	11.6593	0.0043047		0	0.00215235
25.4137	c27:2?	0	0	0	14.1138	0.00311925		0	24.1276	0.00409562	0.00120248		22.5531	UNKN ecl22.553	9.75866	0.00360298		0	0.00180149
26.2438	C28:2	0.0287729	0.00890466	0.00853204	84.5328	0.0186823	83.6241	0.0301614	79.1105	0.0134289	0.0180804		23.5154	C24:1w9c	8.34232	0.00308005		0	0.00154003
	Sum				4524.75		2772.55		5891.06	1			23.8321	25:1w8	57.0769	0.0210733	40.6903	0.0269839	0.0240286
													23.9801	UNKN ecl23.980	24.2724	0.00896159		0	0.0044808
	bacterial	0.640931	0.712788	0.719146		0.657327		0.596372		0.667913	0.665746		24.008	25:2w?	10.0533	0.00371175		0	0.00185587
	sponge	0.218071	0.164235	0.148592		0.245383		0.299216		0.233002	0.218083		24.262	26:1w	38.5856	0.0142461		0	0.00712307
	other	0.0972402	0.0904673	0.095513		0.0972904		0.104413		0.0990856	0.0973348		24.5301	UNKN ecl24.530	20.2664	0.00748253		0	0.00374127
													24.6909	C26:2(d5,9)	97.2712	0.0359133	17.2221	0.0114209	0.0236671
	sum 16:1	0.0993836	0.111255	0.116208		0.108829		0.12242		0.117717	0.112636		24.7521	C26:2(d9,19)	107.487	0.0396851	69.9649	0.0463974	0.0430413
	sum 18:1	0.0435513	0.0453889	0.0431436		0.0480313		0.0366463		0.044812	0.0435955		25.037	Me-C26:2	89.9893	0.0332248	77.8444	0.0516227	0.0424238
													25.1231	Me-C26:2	128.021	0.0472663	87.6935	0.0581542	0.0527102	0.095134
	C26:2	0.128455	0.108981	0.0924705		0.10546		0.106529		0.109275	0.108529		25.171	Me-C26:2	43.7157	0.0161402	31.4627	0.0208646	0.0185024
	sum 27:2	0.043758	0.0325104	0.0367499		0.0987534		0.136575		0.0838091	0.0720259		25.2464	a(i)-C27:2	34.9785	0.0129144	17.9383	0.0118958	0.0124051	0.0491698
													25.3129	a(i)-C27:2	15.1887	0.00560779	46.621	0.0309169	0.0182623
													25.5797	UNKN ecl25.58	8.99607	0.00332143		0	0.00166071
													25.8454	C28:2(d11,21)	14.4888	0.0053494	48.9529	0.0324633	0.0189063
													26.2238	UNKN C28:2	20.9837	0.00774734	13.3207	0.00883365	0.0082905
													29.7239	UNKN 30:3w?/32:1w	37.1481	0.0137154	11.53	0.00764612	0.0106808
														sum	2708.5		1507.95
														bacterial		0.615406		0.497014	0.55621
														sponge		0.276361		0.307199	0.29178
														other		0.10155		0.195786	0.148668
														som 16:1
														som 18:1
														C26:2			0.0755985		0.0578183
														C27:2			0.0346623		0.0636773
														sum 27:2			0.115153		0.173454

## Sheet: summary table (% FA)
ecl	name	Ga	Gb	Gh	Gh	Gh	Gp	Gp	Gp	Sr	Sr	Sr				accross all species
	location			langseth	schulz	schulz	langseth	schulz	schulz	langseth	schulz	schulz					mean	sd
	n	2	6	3	1	1	3	1	1	2	1	1				sum bac	0.670423	0.0616243
	PLFA/TL	PLFA	PLFA	PLFA	PLFA	TL	PLFA	PLFA	TL	PLFA	PLFA	TL				sum sponge	0.208844	0.0567624
13.6801	C14:0	0.877948	0.958854	0.8506	1.30596	1.48885	0.797803	0.960922	1.14997	1.70973	1.05551	1.15961				sum other	0.096577	0.0283497
14.1684	Me-C14:0	0.675498	1.37592	1.31326	1.50833	2.27235	1.25915	1.47499	2.45498	1.90015	1.65662	2.72464
14.3815	i-C15:0	3.02553	3.54134	3.5072	1.8672	1.7464	2.5586	2.31545	2.12357	4.87891	2.1414	1.70742				Actual concentration
14.4609	a-C15:0	2.61345	2.57479	2.11856	2.57648	2.3645	1.72745	2.71674	2.42093	4.78761	3.26943	2.7079					mean	sd
15.35	Me-C15:0	0.631001	0.932869	1.66911	1.58951	2.7154	1.91356	1.32288	1.94941	1.81376	1.11961	2.20068				Sum PLFA	6.71439	6.36244	mg g dw-1
15.5949	C16:1ω9	1.57599	0.456975	2.56523	2.66044	2.51717	3.64061	2.47113	2.0947	2.69352	2.15365	1.6109
15.6765	C16:1ω7	6.38522	8.66753	8.25295	6.62918	5.36868	6.09725	6.91341	5.77894	8.42364	7.67859	5.9563
15.7846	C16:1ω5	1.48146	2.13905	1.70879	2.27822	2.51714	1.5284	1.66291	1.98445	2.84837	2.29101	2.28116
16	C16:0	5.7736	3.72475	3.57966	3.38755	3.17948	3.22408	3.07455	3.08324	4.54274	3.55378	2.93352
16.3143	i-C17:1ω7	4.23962	5.37377	1.88602	0.511737	5.15581	0.949071	1.14698	4.85255	1.62086	0.926063	5.15019
16.448	8- or 9-Me-C16:0	8.36231	10.3542	13.3246	14.1557	13.8317	10.1297	15.0197	12.6302	12.2328	15.7293	12.8721
16.6238	i-C17:0	1.06087	1.32014	1.09326	1.59516	1.29725	1.20061	1.5085	1.0169	2.33672	1.88539	1.26476
16.6799	a-C17:0	1.42018	1.29521	0.88744	1.03968	1.07503	0.808927	0.931225	0.928413	1.28463	1.12589	1.00755
16.9801	C17:0								2.79303			2.06816
17.4043	Me-C17:0	3.10346	2.78681	1.58644	2.05218	1.96177	1.86199	1.83773	1.85567	2.07509	1.85531	1.91007
17.65	C18:1ω9	1.20474	0.156778	1.58756	1.40818	1.29833	1.44136	1.38679	1.18927	1.62524	1.38533	1.10662
17.7207	C18:1ω7	3.1706	4.20278	3.2002	5.48694	4.3998	3.96077	3.57032	3.44451	3.1036	4.80741	3.73935
18	C18:0	4.69288	3.73524	3.1824	2.27999	2.13805	3.203	2.22852	1.98516	3.42649	2.30662	2.03919
18.113	Me-C18:1ω12 or ω14	1.96452	2.86875	3.67965	4.80417	3.94451	4.41285	4.20445	3.49837	4.77542	5.04371	4.18022
18.4613	10- or 11-Me-C18:0	12.0856	17.3751	19.9635	18.3794	17.4869	23.7659	20.2823	17.0092	17.8226	22.563	18.6638
18.783	cy-C19:0	0.947993	1.15261	1.13636	1.49686	1.12423	0.795139	1.01897	0.833261	1.17454	1.54023	1.0942
20.8533	C22:6ω3	1.86901	1.31464	0.178009	0.270782		0.710032	0.445579	0.433207
23.1667	C24:2Δ(5,9)						1.19161	1.38036	1.55726	0.183235	0.92926
23.6698	i-C25:2Δ(5,9)						11.6408	8.93141	8.09768		0.570134
23.7426	a-C25:2Δ(5,9)						4.18402	4.17349	3.64248
23.8374	i-C25:1ω7	2.40286	1.82457
24.7299	C26:2Δ(5,9)	2.36671	2.41968	6.03527	3.66891	4.11879			0.614425			0.577492
24.8074	C26:2Δ(9,19)	4.30413	8.43318	8.64506	7.89141	8.63383
25.1108	Me-C26:2Δ(5,9)	9.5134	4.46207	1.8563	1.32432	1.20646				1.38475	0.964906	1.2138
25.2758	(a)i-C27:2Δ(5,9)/(9,19)	4.91698	2.86077		0.18563					0.809482	0.479425	0.162326
25.96	C28:2Δ(5,9)									1.27841	1.87021	1.1211
26.1356	C28:2Δ(11,21)	1.89063	1.80804				4.32203	1.60174	1.99495
26.7079	Me-C28:2Δ(5,9)									5.82716	4.79971	5.48054

## Sheet: Table 1 MS
ecl	name	GA	GB	GH	GP	SR		average	SD	min	max
	n	2	6	4	4	4
13.6801	C14:0	0.877948	0.958854	0.96444	0.838582	1.49166		1.0263	0.265602	0.838582	1.49166
14.1684	Me-C14:0	0.675498	1.37592	1.36203	1.31311	1.81898		1.30911	0.408872	0.675498	1.81898
14.3815	i-C15:0	3.02553	3.54134	3.0972	2.49781	3.9664		3.22566	0.555578	2.49781	3.9664
14.4609	ai-C15:0	2.61345	2.57479	2.23304	1.97478	4.28155		2.73552	0.903073	1.97478	4.28155
15.35	Me-C15:0	0.631001	0.932869	1.64921	1.76589	1.58238		1.31227	0.500082	0.631001	1.76589
15.5949	C16:1ω9	1.57599	0.456975	2.58903	3.34824	2.51356		2.09676	1.11157	0.456975	3.34824
15.6765	C16:1ω7	6.38522	8.66753	7.84701	6.30129	8.17529		7.47527	1.07426	6.30129	8.66753
15.7846	C16:1ω5	1.48146	2.13905	1.85115	1.56203	2.66258		1.93925	0.480305	1.48146	2.66258
16	C16:0	5.7736	3.72475	3.53164	3.18669	4.21308		4.08595	1.01374	3.18669	5.7736
16.3143	i-C17:1ω7	4.23962	5.37377	1.42793	1.01504	1.38926		2.68913	1.98079	1.01504	5.37377
16.448	8- or 9-Me-C16:0	8.36231	10.3542	13.5324	11.3522	13.3983		11.3999	2.17162	8.36231	13.5324
16.6238	i-C17:0	1.06087	1.32014	1.21874	1.27759	2.18628		1.41272	0.443465	1.06087	2.18628
16.6799	ai-C17:0	1.42018	1.29521	0.9255	0.839501	1.23172		1.14242	0.248637	0.839501	1.42018
17.4043	Me-C17:0	3.10346	2.78681	1.73617	1.85593	2.00183		2.29684	0.60961	1.73617	3.10346
17.65	C18:1ω9	1.20474	0.156778	1.54272	1.42317	1.54527		1.17453	0.585568	0.156778	1.54527
17.7207	C18:1ω7	3.1706	4.20278	3.77189	3.86316	3.67154		3.73599	0.37389	3.1706	4.20278
18	C18:0	4.69288	3.73524	2.9568	2.95938	3.0532		3.4795	0.752193	2.9568	4.69288
18.113	Me-C18:1ω12 or ω14	1.96452	2.86875	3.96078	4.36075	4.86485		3.60393	1.17454	1.96452	4.86485
18.4613	10- or 11-Me-C18:0	12.0856	17.3751	19.5675	22.895	19.4027		18.2652	3.98135	12.0856	22.895
18.783	cy-C19:0	0.947993	1.15261	1.22649	0.815596	1.29643		1.08782	0.200378	0.815596	1.29643
20.8533	C22:6ω3	1.86901	1.31464	0.201202	0.643919	0		0.805754	0.779485	0	1.86901
23.1667	C24:2Δ(5,9)				1.2388			1.2388		1.2388	1.2388
23.6698	i-C25:2Δ(5,9)				10.9635			10.9635		10.9635	10.9635
23.7426	ai-C25:2Δ(5,9)				4.18138			4.18138		4.18138	4.18138
23.8374	i-C25:1ω7	2.40286	1.82457					2.11371	0.408915	1.82457	2.40286
24.7299	C26:2Δ(5,9)	2.36671	2.41968	5.44368	0.448378	0.43191		2.22207	2.04874	0.43191	5.44368
24.8074	C26:2Δ(9,19)	4.30413	8.43318	8.45665	0.59164			5.4464	3.77959	0.59164	8.45665
25.1108	Me-C26:2Δ(5,9)	9.5134	4.46207	1.67897		1.2448		4.22481	3.80295	1.2448	9.5134
25.2758	(a)i-C27:2Δ(5,9)/(9,19)	4.91698	2.86077	1.30598		0.699463		2.4458	1.88218	0.699463	4.91698
25.96	C28:2Δ(5,9)					1.47568		1.47568		1.47568	1.47568
26.1356	C28:2Δ(11,21)	1.89063	1.80804		3.64196			2.44688	1.0358	1.80804	3.64196
26.7079	Me-C28:2Δ(5,9)					5.48467		5.48467		5.48467	5.48467

## Sheet: Me-branched fragments
FA	8-MeC16	9-MeC16	9-MeC16-corrected	10-MeC16	11-MeC16			9me corrected for 11-Me	9-MeC18	10-MeC18	11-MeC18
mass					185						185
	171	185	213-185	199	213	sum		213-185	185	199	213	sum
GA1	25966	49049	49049	27420	0	102435		16837	43772	24707	26935	68479
	0.253488		0.47883	0.267682	0	1		0.245871		0.360797	0.393332	1
GA2	2019874	1752731	1436209	929990	316522	4702595		306457	3442489	2179775	3136032	5622264
	0.429523		0.305408	0.197761	0.0673079	1		0.0545078		0.387704	0.557788	1
GB1	3238803	4313042	3533201	2703711	779841	10255556		957557	4548762	2879407	3591205	7428169
	0.31581		0.344516	0.263634	0.0760408	1		0.128909		0.387633	0.483458	1
GB2	2006198	2800392	2301812	1605438	498580	6412028		242602	2977267	2274745	2734665	5252012
	0.31288		0.358983	0.250379	0.077757	1		0.0461922		0.433119	0.520689	1
GH2_Langseth	2768403	2843506	2085124	2051544	758382	7663453		0	4822828	2810221	5231267	8041488
	0.361247		0.272087	0.267705	0.0989609	1		0		0.349465	0.650535	1
GH_Schulz	328581	359205	300548	221970	58657	909756		74523	462182	370107	387659	832289
	0.361175		0.330361	0.243988	0.0644755	1		0.0895398		0.444686	0.465775	1
GP3_Langseth	4208019	9937220	8476801	5759284	1460419	19904523		815571	13950370	9865396	13134799	23815766
	0.21141		0.425873	0.289345	0.0733712	1		0.034245		0.414238	0.551517	1
GP_Schulz	610455	727371	615209	417365	112162	1755191		140707	1099824	737265	959117	1837089
	0.3478		0.350508	0.237789	0.063903	1		0.0765924		0.401322	0.522085	1
SR1_Langseth	5467680	9680187	8842083	4410641	838104	19558508		9388039	20657957	1998538	11269918	22656495
	0.279555		0.452084	0.22551	0.0428511	1		0.414364		0.0882104	0.497425	1
SR2_Langseth	1053952	1679515	1513305	991863	166210	3725330		4128911	6453927	3153137	2325016	9607064
	0.282915		0.40622	0.266248	0.0446162	1		0.429779		0.32821	0.242011	1
SR_Schulz	748909	865841	747646	473817	118195	2088567		166248	1273308	1054095	1107060	2327403
	0.358576		0.357971	0.226862	0.0565914	1		0.0714307		0.452906	0.475663	1
average	0.319489		0.371167	0.248809	0.0605341	1		0.155719		0.363405	0.480876	1
if 185 and 213 are equal, its 11, excess 185 belongs to 9 position

## Sheet: hydrogenation positions
Barretti				Atlantica				hentscheli			Parva				Stelletta					a
mstime (barretti)	rel	peak	me - br	ms time	rel	name	me-br	ms	rel	name	ms time	rel	name	me-br	ms time	rel	name	me-br
5.6	14	14		6	14	14
6.84	14.7006	i15		6.82	14.5942	i15
6.95	14.7627	a15		7	14.7246	a15
7.37	15	15		7.38	15	15
9.1	16	16		9.01	16	16
9.83	16.4269	me16	9?	9.78	16.4278	me16
10.2	16.6433	i17		10.15	16.6333	i17
10.3	16.7018	a17		10.28	16.7056	a17
10.81	17	17		10.81	17	17
11.59	17.4041	me17	10?	11.58	17.4118	me-17
12.74	18	18		12.68	18	18
13.56	18.4362	me-18		13.46	18.4062	me-18
13.92	18.6277	i19
14.05	18.6968	a19
14.62	19	19		14.6		19
16.49	20	20
20.19	22	22
22.6
23.62		24									23.64		24
24.3	24.4072	me-24	18?
24.7	24.6467	me-24	23 (i)								24.75	24.6768	me-24	23 (i)
											24.9	24.7683	me-24	22 (a)
25.29	25	25									25.28		25
26.96	26	26			26.88	26	26	27.01	26	26					26.89		26
27.55	26.3831	me-26	17		27.51	26.4091	17								27.53	26.4156	17
27.66	26.4545	me-26	18?		27.6	26.4675	19?	27.62	26.4388	18?					27.62	26.474	19
27.94	26.6364	me-26	25 (i)		27.87	26.6429	25(i)	27.88	26.6259						27.89	26.6494	i
															28	26.7208	a
28.5	27	27			28.42	27		28.4	27	27					28.43	27	27
29.13	27.4345	me-27	19												29.08		me-27
29.95	28	28													29.97		28
															30.62	28.4483	me-28	20?
															31.42		29

## Sheet: Isotope data
marker	isotope	species	place
C16:0	-23.02	GP	Schulz
C16:0	-23.11	GH	Schulz
C16:0	-22.97	SR	Schulz
C16:0	-20.62	GP	Karasik
C16:0	-20.77	GP	Karasik
C16:0	-19.9	GP	Karasik
C16:0	-21.97	GH	Karasik
C16:0	-21.81	GH	Karasik
C16:0	-20.72	GH	Karasik
C16:0	-20.6	SR	Karasik
C16:0	-21.77	GB	Barents
C16:0	-21.89	GB	Barents
(a)i-C15:0	-23.04	GH	Schulz
(a)i-C15:0	-23.87	GP	Schulz
(a)i-C15:0	-23.89	SR	Schulz
(a)i-C15:0	-22.2	GP	Karasik
(a)i-C15:0	-22.48	GP	Karasik
(a)i-C15:0	-22.17	GP	Karasik
(a)i-C15:0	-23.02	GH	Karasik
(a)i-C15:0	-23.13	GH	Karasik
(a)i-C15:0	-22.49	GH	Karasik
(a)i-C15:0	-23.05	SR	Karasik
(a)i-C15:0	-22.36	GB	Barents
(a)i-C15:0	-22.5	GB	Barents
(a)i-C15:0	-22.27	GB	Barents
(a)i-C15:0	-22.37	GB	Barents
(a)i-C15:0	-23.47	GA	Barents
C16:1w7	-25.65	GH	Schulz
C16:1w7	-26.79	GP	Schulz
C16:1w7	-26.03	SR	Schulz
C16:1w7	-22.22	GB	Barents
C16:1w7	-22.39	GB	Barents
C16:1w7	-21.58	GB	Barents
C16:1w7	-21.73	GB	Barents
C16:1w7	-22.2	GA	Barents
C16:1w7	-20.97	GP	Karasik
C16:1w7	-22.68	GP	Karasik
C16:1w7	-20.19	GP	Karasik
C16:1w7	-24.54	GH	Karasik
C16:1w7	-23.8	GH	Karasik
C16:1w7	-21.18	GH	Karasik
C16:1w7	-22.35	SR	Karasik
me-C16:0	-18.71	GH	Schulz
me-C16:0	-20.19	GP	Schulz
me-C16:0	-20.26	SR	Schulz
me-C16:0	-17.84	GP	Karasik
me-C16:0	-18.04	GP	Karasik
me-C16:0	-17.21	GP	Karasik
me-C16:0	-19.44	GH	Karasik
me-C16:0	-18.55	GH	Karasik
me-C16:0	-17.39	GH	Karasik
me-C16:0	-17.74	SR	Karasik
me-C16:0	-18.4	GA	Barents
me-C16:0	-22.69	GA	Barents
me-C16:0	-22.09	GA	Barents
me-C16:0	-20.04	GB	Barents
me-C16:0	-20.22	GB	Barents
me-C16:0	-18.94	GB	Barents
me-C16:0	-20.35	GB	Barents
i-C17:1w7	-28.3	GP	Schulz
i-C17:1w7	-26.57	SR	Schulz
i-C17:1w7	-25.78	GP	Karasik
i-C17:1w7	-22.89	GP	Karasik
i-C17:1w7	-25.35	GP	Karasik
i-C17:1w7	-26.1	GH	Karasik
i-C17:1w7	-25.62	GH	Karasik
i-C17:1w7	-24.12	GH	Karasik
i-C17:1w7	-25.38	SR	Karasik
i-C17:1w7	-26.99	GA	Barents
i-C17:1w7	-26.03	GB	Barents
i-C17:1w7	-24.96	GB	Barents
i-C17:1w7	-25.13	GB	Barents
i-C17:1w7	-26.14	GB	Barents
C18:0	-21.47	GH	Schulz
C18:0	-21.17	GP	Schulz
C18:0	-20.29	SR	Schulz
C18:0	-18.77	GP	Karasik
C18:0	-20.05	GP	Karasik
C18:0	-20.13	GP	Karasik
C18:0	-19.27	GH	Karasik
C18:0	-18.9	GH	Karasik
C18:0	-18.73	GH	Karasik
C18:0	-18.45	SR	Karasik
C18:0	-20.91	GB	Barents
C18:0	-22.17	GB	Barents
C18:0	-21.15	GB	Barents
C18:0	-20.83	GB	Barents
me-C18:0	-19.98	GH	Schulz
me-C18:0	-19.44	GP	Schulz
me-C18:0	-19.5	SR	Schulz
me-C18:0	-17.53	GP	Karasik
me-C18:0	-17.82	GP	Karasik
me-C18:0	-16.55	GP	Karasik
me-C18:0	-18.32	GH	Karasik
me-C18:0	-17.65	GH	Karasik
me-C18:0	-17.15	GH	Karasik
me-C18:0	-17.28	SR	Karasik
me-C18:0	-19.55	GA	Barents
me-C18:0	-19.41	GA	Barents
me-C18:0	-20.7	GA	Barents
me-C18:0	-18.05	GB	Barents
me-C18:0	-18.05	GB	Barents
me-C18:0	-18.08	GB	Barents
me-C18:0	-17.92	GB	Barents
me-18:1	-19.37	GH	Schulz
me-18:1	-19.91	GP	Schulz
me-18:1	-19.22	SR	Schulz
me-18:1	-16.96	GP	Karasik
me-18:1	-17.31	GP	Karasik
me-18:1	-15.17	GP	Karasik
me-18:1	-17.47	GH	Karasik
me-18:1	-16.89	GH	Karasik
me-18:1	-16.89	GH	Karasik
me-18:1	-16.6	SR	Karasik
me-18:1	-17.61	GB	Barents
me-18:1	-16.69	GB	Barents
me-18:1	-17.22	GB	Barents
me-18:1	-16.26	GB	Barents
me-18:1	-17.87	GA	Barents
C18:1w7	-25.55	GH	Schulz
C18:1w7	-26.71	GP	Schulz
C18:1w7	-24.89	SR	Schulz
C18:1w7	-23.61	GP	Karasik
C18:1w7	-23.13	GP	Karasik
C18:1w7	-21.28	GP	Karasik
C18:1w7	-24.39	GH	Karasik
C18:1w7	-24.58	GH	Karasik
C18:1w7	-22.05	GH	Karasik
C18:1w7	-23.73	SR	Karasik
C18:1w7	-22	GB	Barents
C18:1w7	-23.29	GB	Barents
C18:1w7	-22.61	GB	Barents
C18:1w7	-21.97	GB	Barents
C18:1w7	-24.57	GA	Barents
(a)i-C25:2	-22.79	GP	Schulz
(a)i-C25:2	-21.33	GP	Karasik
(a)i-C25:2	-22.02	GP	Karasik
(a)i-C25:2	-22.02	GP	Karasik
C26:2	-23.8	GH	Schulz
C26:2	-22.18	GH	Karasik
C26:2	-22.36	GH	Karasik
C26:2	-20.96	GH	Karasik
C26:2	-22.35	GA	Barents
C26:2	-21.35	GA	Barents
C26:2	-21.64	GA	Barents
C26:2	-21.74	GB	Barents
C26:2	-20.6	GB	Barents
C26:2	-21.74	GB	Barents
C26:2	-21.16	GB	Barents
me-C28:2	-19.3	SR	Schulz
me-C28:2	-19.59	SR	Karasik
C28:2	-23.44	GP	Schulz
C28:2	-22.62	GP	Karasik
C28:2	-25.13	GP	Karasik
C28:2	-21.8	GP	Karasik
me-C26:2	-20.07	SR	Karasik
me-C26:2	-19.41	GA	Barents
me-C26:2	-20.64	GB	Barents
me-C26:2	-21.13	GB	Barents
me-C26:2	-20.34	GB	Barents
me-C26:2	-19.44	GB	Barents
me-C26:2	-20.08	SR	Schulz
(a)i-C27:2	-20.05	GH	Schulz
(a)i-C27:2	-20.34	GH	Schulz
(a)i-C27:2	-22.25	SR	Karasik
(a)i-C27:2	-20.3	GB	Barents
(a)i-C27:2	-23.19	GB	Barents
(a)i-C27:2	-20.28	GB	Barents
(a)i-C27:2	-19.73	GB	Barents
(a)i-C27:2	-21.75	SR	Schulz
i-C25:1w7	-23.78	GB	Barents
i-C25:1w7	-23.82	GB	Barents
i-C25:1w7	-23.69	GB	Barents
i-C25:1w7	-23.07	GB	Barents
i-C25:1w7	-24.98	GA	Barents
